# Supplementary material for: Next-generation T cell–activating vaccination increases influenza virus mutation prevalence
Source: PubMed Central journal article supplement (PMC8986104; doi:10.1126/sciadv.abl5209), 2022-04-06
Supplement: sciadv.abl5209_sm.pdf [file sciadv.abl5209_sm.pdf]

Supplementary Materials for  
**Next-generation T cell–activating vaccination increases influenza virus  
mutation prevalence**

Maireid B. Bull, Haogao Gu, Fionn N. L. Ma, Liyanage P. Perera,  
Leo L. M. Poon, Sophie A. Valkenburg\*

\*Corresponding author. Email: [sophie.v@unimelb.edu.au](mailto:sophie.v@unimelb.edu.au)

Published 6 April 2022, *Sci. Adv.* **8**, eabl5209 (2022)  
DOI: [10.1126/sciadv.abl5209](https://doi.org/10.1126/sciadv.abl5209)

**This PDF file includes:**

Figs. S1 to S5  
Table S1

**Supplementary Figures:**

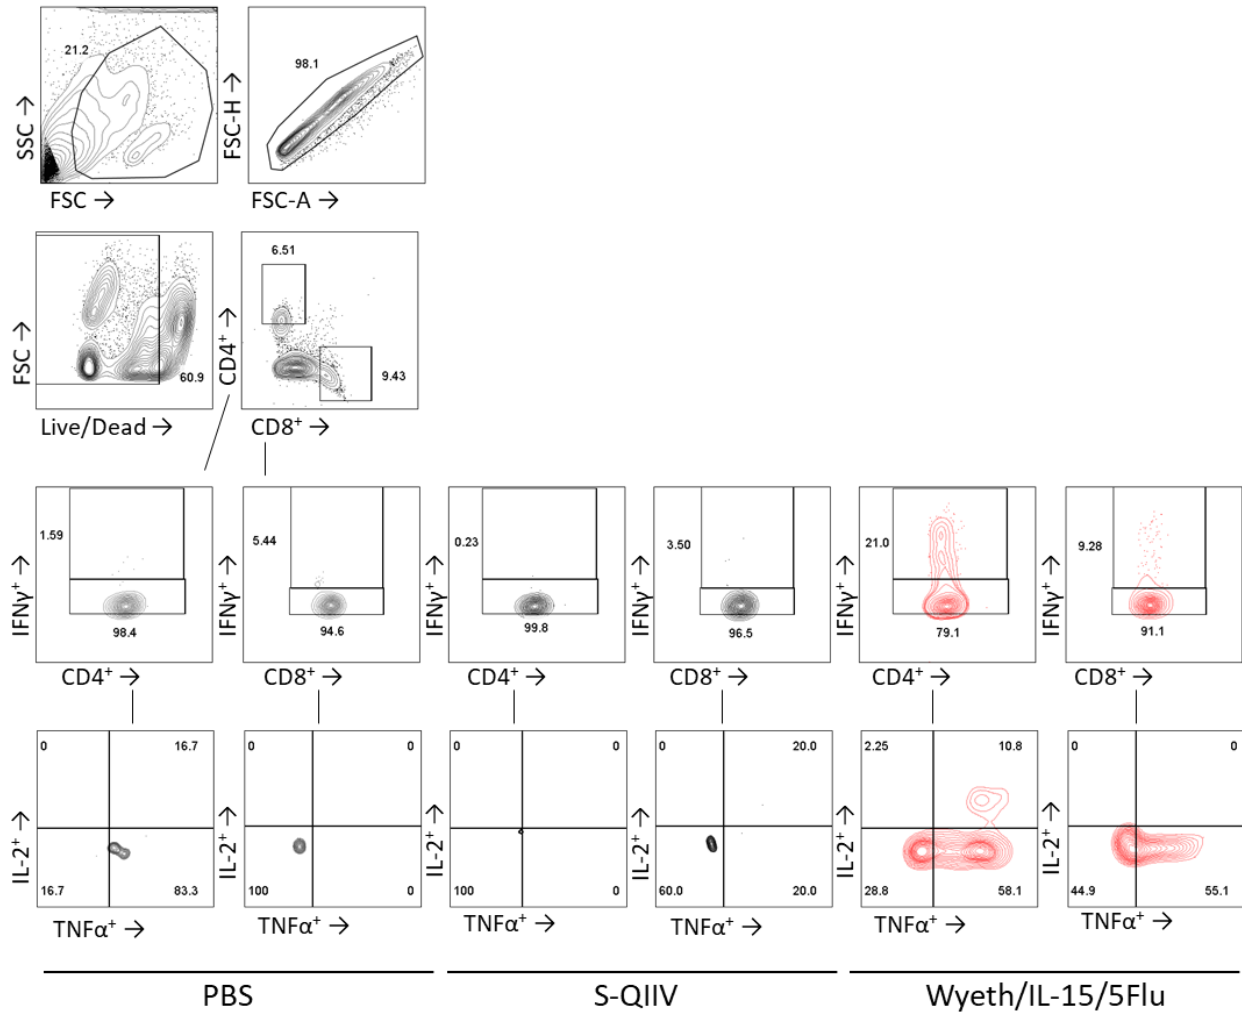

**Figure S1: Flow Cytometry gating strategy to characterise T cells isolated from BALB/c mice. Representative FACS plots showing the gating strategy of identifying IFN $\gamma$ <sup>+</sup> IL-2<sup>+</sup> and TNF $\alpha$ <sup>+</sup> producing CD4<sup>+</sup> and CD8<sup>+</sup> T cell populations in PBS (grey), S-QIIV (black) and Wyeth/IL-15/5Flu (red) vaccinated mice at day 7 H1N1 challenge.**

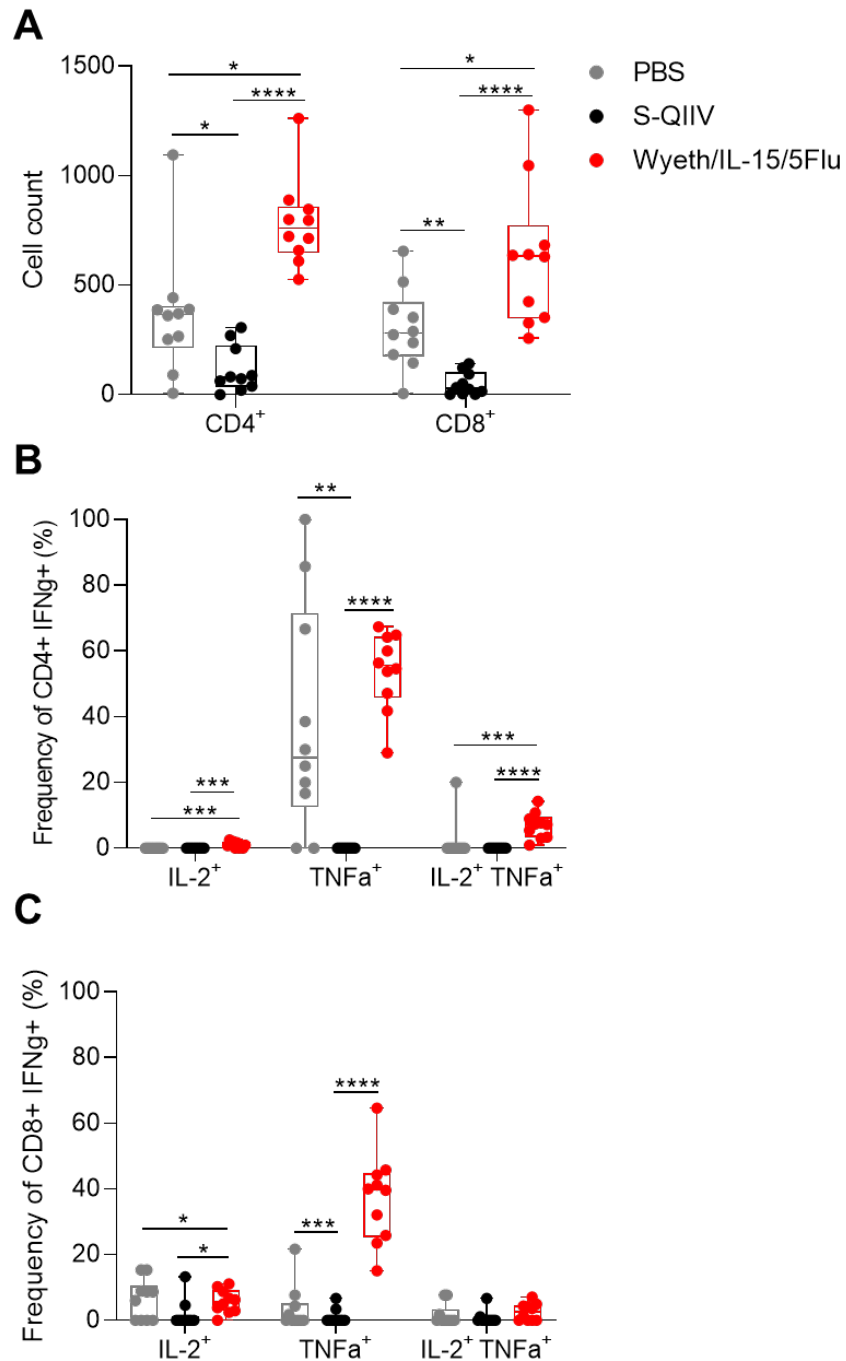

**Figure S2: Cytokine production of vaccine induced T cell responses during infection ICS of T cell populations isolated from BAL fluid from PBS, S-QIIV and Wyeth/IL-15/5Flu at day 7 post H1N1 challenge (n=10). Showing (A) CD4<sup>+</sup> and CD8<sup>+</sup> T cell counts, (B) multicytokine producing CD4<sup>+</sup> T cells, and (C) multicytokine producing CD8<sup>+</sup> T cells. Individual data points shown on box and whiskers plot, showing mean and upper and lower quartiles with min-max range. Statistical significance was determined by a Kruskal-Wallis test. False discovery rate (0.1) was determined by the original Benjamini and Hochberg method. \*  $P < 0.05$ , \*\*  $P < 0.01$ , \*\*\*  $P < 0.005$ , \*\*\*\*  $P < 0.0001$ .**

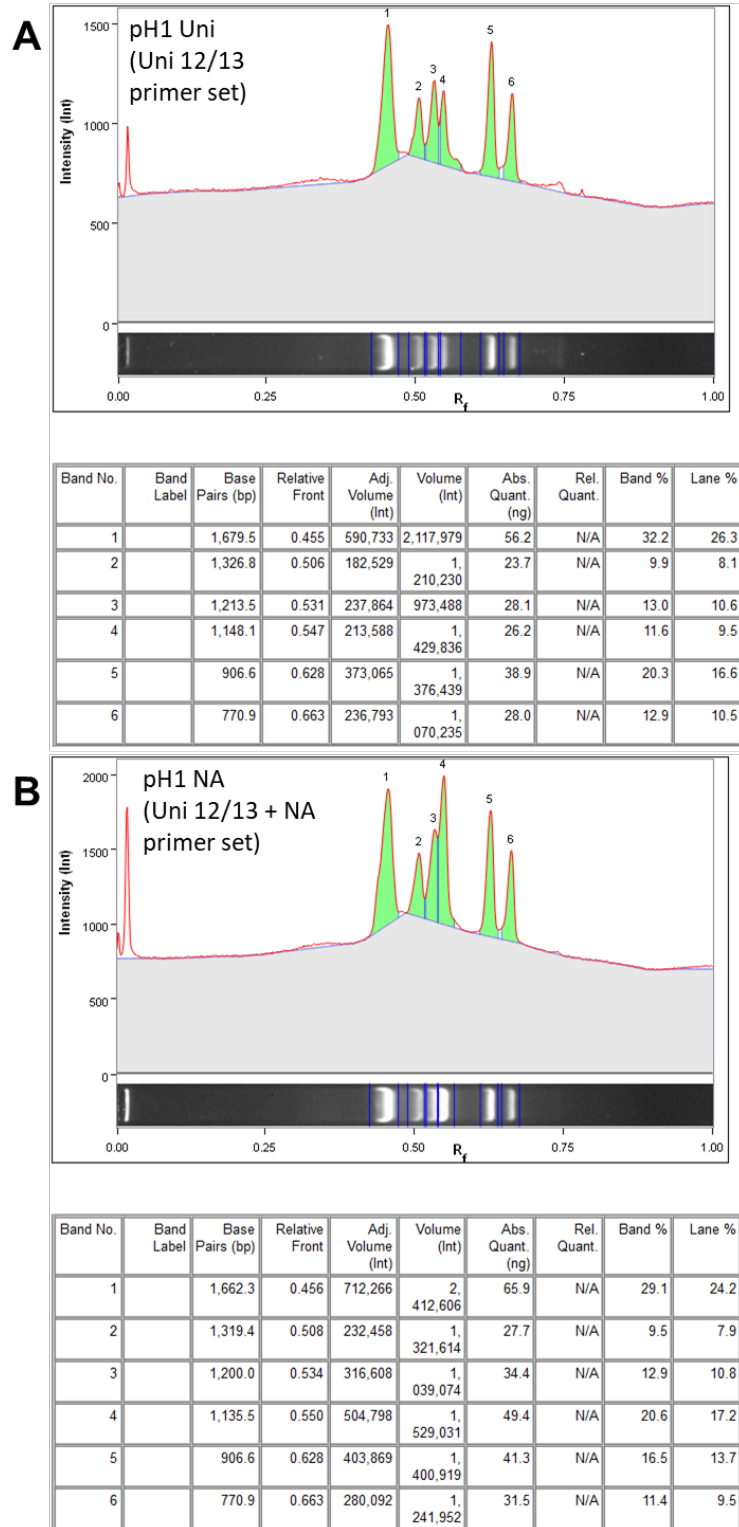

**Figure S3: Spiking of NA specific primers improves RT-PCR NA product quantity**  
Comparison between gene segment estimated quantity determined using BioRad Image Lab between (A) Uni12/13 primer set and (B) Uni12/13 + NA primer set. NA band is at band position 4.

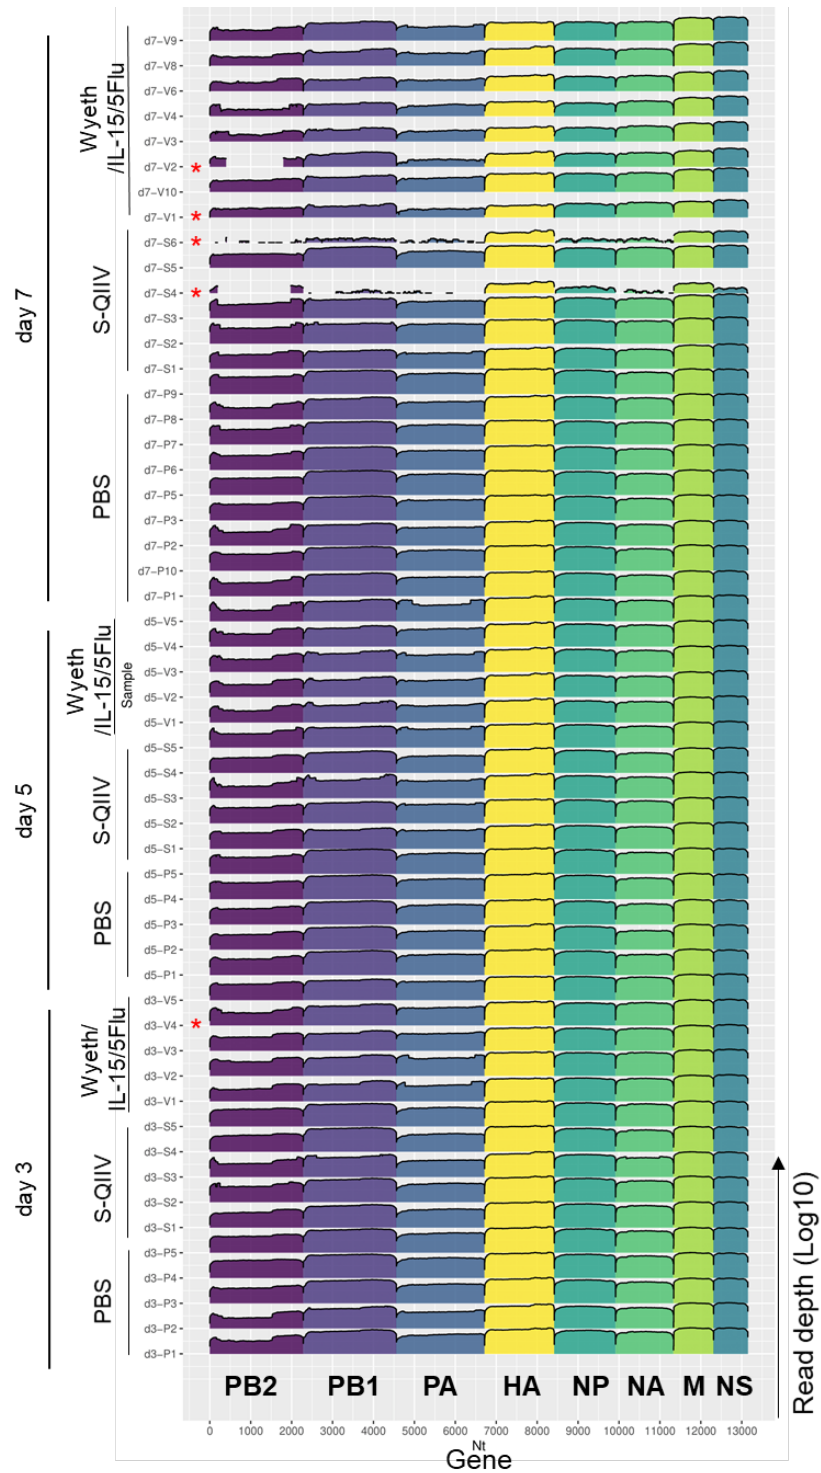

**Figure S4: Read depth and coverage for 8 IAV genes for RT-PCR products Round 2 NGS** read depth across the H1N1 genome from RT-PCR products by NGS from day 3, day 5 and day 7 p.i. mice. Low quality reads removed using Trimmomatic and aligned to H1N1 (Ca04/09) reference genome using BWA-MEM. Data represents individual mice and samples annotated by

‘\*’ indicates a sample removed from further analysis due to either <100 read coverage or <0.8 Q33 Phred Score. Data was visualised using R.

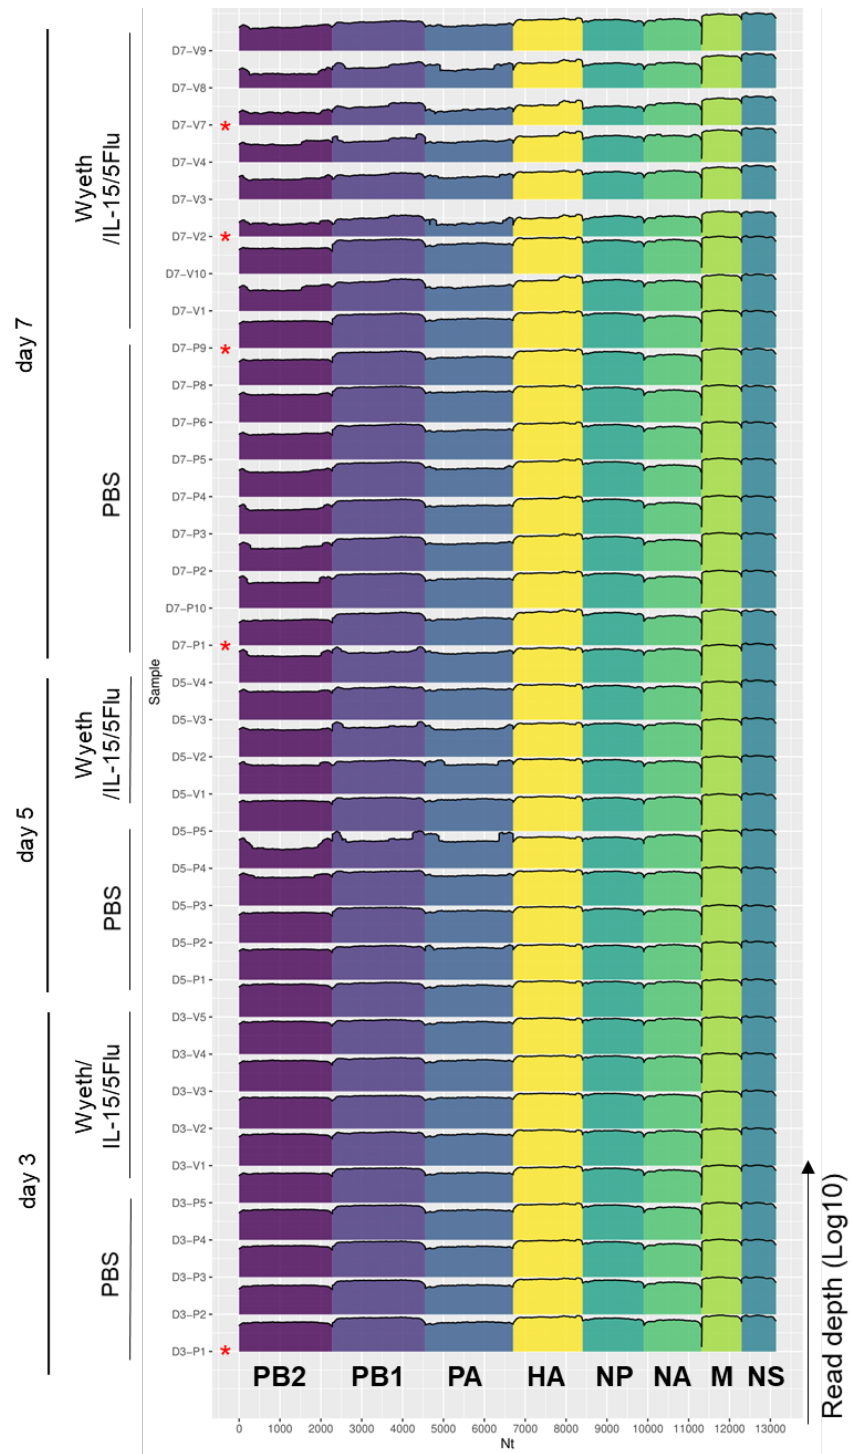

**Figure S5: Read depth and coverage for 8 IAV genes for RT-PCR products Round 1 NGS** read depth across the H1N1 genome from RT-PCR products by NGS from day 3, day 5 and day 7 p.i. mice. Low quality reads removed using Trimmomatic and aligned to H1N1 (Ca04/09) reference genome using BWA-MEM. Data represents individual mice and samples annotated by

‘\*’ indicates a sample removed from further analysis due to either <100 read coverage or <0.8 Q33 Phred Score. Data was visualised using R.



**Table S1: Reverse Genetics attempts of previously defined beneficial mammalian adaptations and mutations within BALB/c T cell epitope regions**

| Reverse Genetics |                         |              |                    |                                 |                       |             |
|------------------|-------------------------|--------------|--------------------|---------------------------------|-----------------------|-------------|
| Round            | Epitope and mutation    | Location     | T cell restriction | Mutational Frequency in NGS (%) | Vaccination group     | HA titre    |
|                  | WT-Ca04                 |              |                    |                                 |                       | 1:4         |
| 1                | HA <sub>518</sub> V5I   | In Epitope   | CD8 <sup>+</sup>   | 1.3                             | PBS                   | Not rescued |
|                  | NP <sub>39</sub> Y2*    | In Epitope   | CD8 <sup>+</sup>   | 0.9                             | Wyeth/IL-15/5Flu      | Not rescued |
|                  | NP <sub>55</sub> R1Q    | In Epitope   | CD4 <sup>+</sup>   | 1.1                             | Wyeth/IL-15/5Flu      | Not rescued |
|                  | NP <sub>147</sub> R4K   | In Epitope   | CD8 <sup>+</sup>   | 1                               | Wyeth/IL-15/5Flu      | Not rescued |
|                  | NP <sub>147</sub> R6C   | In Epitope   | CD8 <sup>+</sup>   | 3.9                             | Wyeth/IL-15/5Flu      | Not rescued |
|                  | WT-Ca04                 |              |                    |                                 |                       | 1:8         |
| 2                | HA <sub>177</sub> K4T   | In Epitope   | CD4 <sup>+</sup>   | 1                               | PBS                   | Not rescued |
|                  | NP <sub>55</sub> E81K   | 11aa outside | CD4 <sup>+</sup>   | 6.6                             | Wyeth/IL-15/5Flu      | Not rescued |
|                  | NP <sub>147</sub> D157N | 2aa outside  | CD8 <sup>+</sup>   | 1                               | Wyeth/IL-15/5Flu      | Not rescued |
|                  | NP <sub>218</sub> V217I | 1aa outside  | CD8 <sup>+</sup>   | 1.1                             | Wyeth/IL-15/5Flu      | Not rescued |
|                  | PA T97I                 | Non-epitope  | n/a                | 18.4                            | PBS, Wyeth/IL-15/5Flu | Not rescued |
|                  | PB2 E158G               | Non-epitope  | n/a                | 90.8                            | PBS, Wyeth/IL-15/5Flu | Not rescued |

Note: Mutants selected for virus rescue by reverse genetics were based on 3 criteria, either: 1) high allele frequency (>0.9%) mutants from Table 2. 2) Mutations outside of epitope regions, but within 15aa of the epitope and above 1% AF were also selected for rescue. Or 3) high frequency polymerase mutants in non-epitope regions were observed in our study and previous studies (37–41). \* indicates ‘amber’ stop mutation.
